# Supplementary material
Source: Elsevier journal article supplement (https://univ-rennes.hal.science/hal-01544468v1/file/mmc1.pdf)
Supplement: mmc1 [file mmc1.pdf]

## Supporting Information

### 1. UV-visible

| Orbitals           | Symmetry | Metal or Porphyrin           |
|--------------------|----------|------------------------------|
| — $d_{x^2-y^2}$    | $b_{1g}$ | Metal                        |
| — $\pi^*$          | $e_g^*$  | Porphyrin<br><b>(LUMO)</b>   |
| — $d_{z^2}$        | $a_{1g}$ | Metal                        |
| — $d_{xz}, d_{yz}$ | $e_g$    | Metal                        |
| — $d_{xy}$         | $b_{2g}$ | Metal                        |
| — $\pi$            | $a_{2u}$ | Porphyrin }<br><b>(HOMO)</b> |
| — $\pi$            | $a_{1u}$ |                              |

Figure SI-1. Energy levels of the frontier orbitals of manganese(III) metalloporphyrins.

### 2. Crystallography

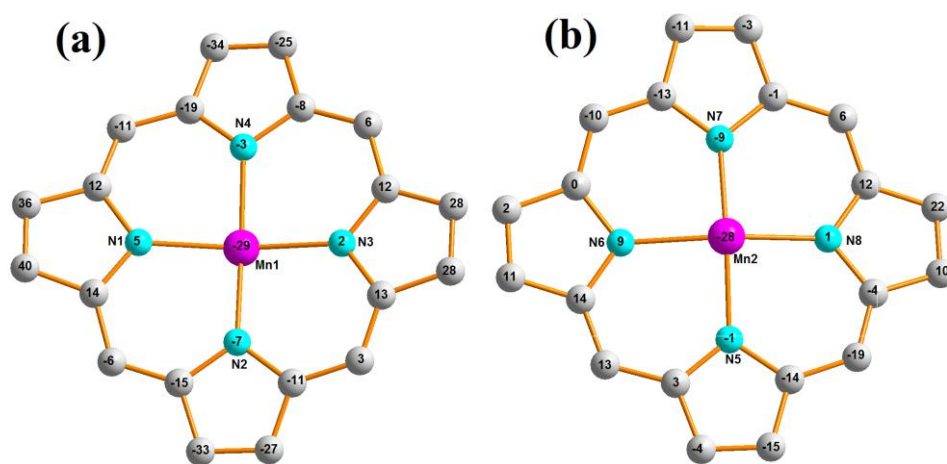

Figure SI-2. Formal diagrams of the porphyrinato cores of  $[\text{Mn}^{\text{III}}(\text{TPP})(\text{OAc})]$  (a): first molecule in the asymmetric unit and (b): second molecule in the asymmetric unit. The displacement of each atom from the mean plane of the 24-atom porphyrin macrocycle is given in unit of 0.01 Å.

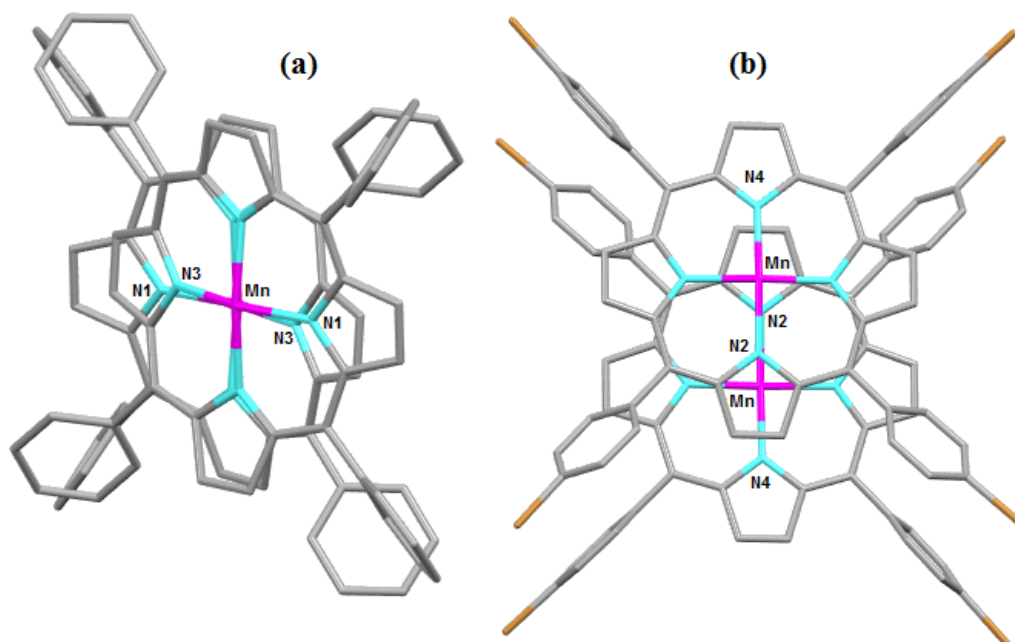

Figure SI-3. Projection showing the parallel superposition of the vectors joining opposite nitrogen atoms of the two macrocycles of one dimer, (a): complex 1 and (b): complex 2.

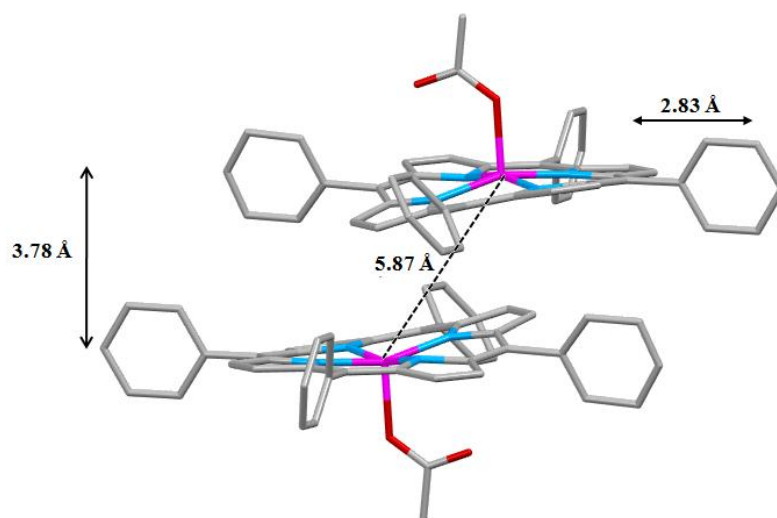

Figure SI-4. Schematic representations of one dimer of the  $[\text{Mn}^{\text{III}}(\text{TPP})(\text{OAc})]$  complex.

Table SI-1. Hydrogen bonds and Selected C–H...Cg intermolecular interactions for **1-2**.

| Complex                         | D <sup>a</sup> ...A <sup>b</sup> [Å] | D–H...A |
|---------------------------------|--------------------------------------|---------|
| <b>Complex 1</b>                |                                      |         |
| C23–H23...O2 <sup>[i]</sup>     | 3.308 (6)                            | 155     |
| C35–H35...O1 <sup>[ii]</sup>    | 3.301 (5)                            | 135     |
| C41–H41...Cl3A <sup>[iii]</sup> | 3.614 (5)                            | 146     |
| C41–H41...O2 <sup>[iii]</sup>   | 3.252 (6)                            | 144     |
| C22–H22...Cg3 <sup>[iv]</sup>   | 3.402 (4)                            | 119     |
| C24–H24...Cg4 <sup>[i]</sup>    | 3.437 (5)                            | 139     |
| C31–H31...Cg12 <sup>[vi]</sup>  | 3.600 (5)                            | 155     |
| C35–H35...Cg1 <sup>[ii]</sup>   | 3.692 (6)                            | 141     |
| C38–H38...Cg9 <sup>[v]</sup>    | 3.828 (5)                            | 155     |
| C44–H44...Cg10 <sup>[iv]</sup>  | 3.737 (4)                            | 151     |
| <b>Complex 2</b>                |                                      |         |
| C7–H7...Cl4A <sup>[i]</sup>     | 3.290 (13)                           | 156     |
| C29–H29...O1 <sup>[ii]</sup>    | 3.190 (8)                            | 128     |
| C34–H34...Cl4A <sup>[iii]</sup> | 3.497 (14)                           | 144     |
| C22–H22...Cg10 <sup>[iii]</sup> | 3.742(8)                             | 144     |
| C29–H29...Cg6 <sup>[iii]</sup>  | 3.617(7)                             | 126     |
| C32–H32...Cg1 <sup>[iv]</sup>   | 3.562(7)                             | 140     |

<sup>a</sup> D = donor atom, <sup>b</sup> A = acceptor atom.

Complex 1:

Cg1 is the centroid of the N1/C1–C4 five-member ring, Cg3 is the centroid of the N3/C8–C11 five-member ring. Cg4 is the centroid of the N4/C13–C16 five-member ring, Cg9 is the centroid of the C21–C26 six-member ring. Cg10 is the centroid of the C27–C32 six-member ring, Cg12 is the centroid of the C39–C44 six-member ring. Symmetry codes : (i) -1+x,y,z; (ii) -x,1-y,1-z ; (iii) -1/2+x,1/2-y,1/2+z ;(iv) -x,-y,-z ; (v) 1/2-x,1/2+y,1/2-z ; (vi) x,y,-1+z.

Complex 2:

Cg1 is the centroid of the N1/C1–C4 five-member ring, Cg10 is the centroid of the C27–C32 six-member ring. Cg11 is the centroid of the C21–C26 six-member ring.

Symmetry codes: (i) -x,1-y,1-z; (ii) x,y,z; (iii) 2-x,1-y,1-z ;(iv) 1-x,1-y,1-z.

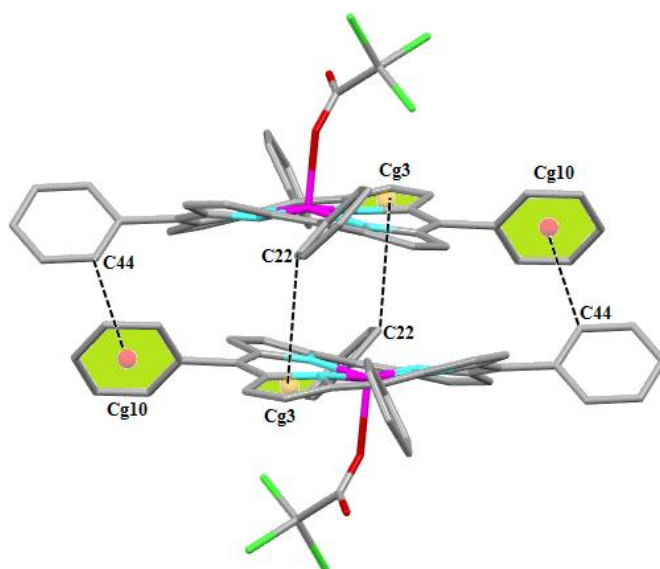

Figure SI-5. Schematic representation of the C–H $\cdots$ Cg intermolecular interactions in complex **1** where Cg is the centroid of a phenyl ring of the TPP porphyrinate.

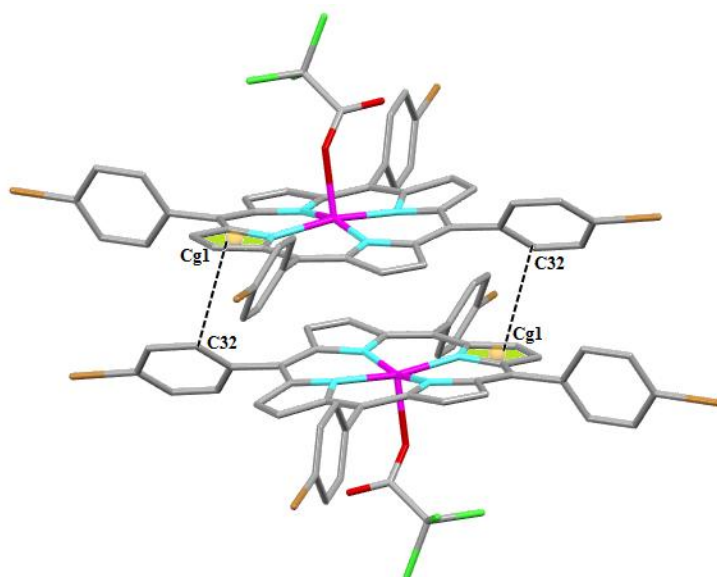

Figure SI-6. Schematic representation of the C–H $\cdots$ Cg intermolecular interactions in complex **1** where Cg is the centroid of a pyrrole ring of the TBrPP porphyrinate.
